# Supplementary material for: A highly efficient LaOCl supported Fe–Fe3C-based catalyst for hydrogenation of nitroarenes fabricated by coordination-assisted pyrolysis
Source: Royal Society of Chemistry journal article supplement (doi:10.1039/d1cy00350j), 2021-01-01
Supplement: d1cy00350j1.pdf [file d1cy00350j1.pdf]

Electronic Supplementary Material (ESI) for Catalysis Science & Technology.  
This journal is © The Royal Society of Chemistry 2021

## Supplementary Information

### **High efficiency LaOCl supported Fe-Fe<sub>3</sub>C-based catalyst for hydrogenation of nitroarenes fabricated by coordination-assisted- pyrolysis**

Xuwei Li,<sup>a</sup> Wei She,<sup>a</sup> Jing Wang,<sup>a</sup> Weizuo Li<sup>\*ab</sup> and Guangming Li<sup>\*a</sup>

<sup>a</sup>Key Laboratory of Functional Inorganic Material Chemistry (MOE); School of  
Chemistry and Materials Science, Heilongjiang University, Harbin, 150080,  
Heilongjiang, China.

<sup>b</sup>School of Petrochemical Engineering, Changzhou University, Changzhou, 213000,  
Jiangsu, China.

E-mail addresses: gmli@hlju.edu.cn (G. Li); wzli2006@126.com (W. Li)

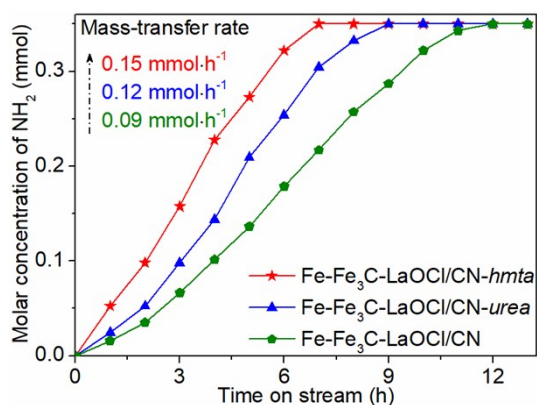

**Fig. S1** Mass-transfer tests of Fe-Fe<sub>3</sub>C-LaOCl/CN-*hmta*, Fe-Fe<sub>3</sub>C-LaOCl/CN-*urea* and Fe-Fe<sub>3</sub>C-LaOCl/CN catalysts.

As shown in Table S1, from the catalytic results, the LaOCl-800 and LaOCl/CN-*hmta*-800 showed very little catalytic activity. The Fe-Fe<sub>3</sub>C/CN-*hmta*-800 catalyst without introduction of LaOCl exhibited considerable catalytic activity, suggesting that the LaOCl support played very little effect on its performance. Therefore, for Fe-Fe<sub>3</sub>C-LaOCl/CN-*hmta* catalyst, the Fe-Fe<sub>3</sub>C is the determined active sites for the hydrogenation of nitrobenzene to aniline. In order to reveal the effect of the Fe and/or Fe<sub>3</sub>C content containing in Fe-Fe<sub>3</sub>C-LaOCl/CN-*hmta* catalyst on the hydrogenation performance, the catalytic activity of Fe-Fe<sub>3</sub>C-LaOCl/CN-*hmta* catalyst pyrolyzed at 600 °C (denoted as Fe-Fe<sub>3</sub>C-LaOCl/CN-*hmta*-600) and 900 °C (Fe-Fe<sub>3</sub>C-LaOCl/CN-*hmta*-900) for hydrogenation of nitrobenzene to aniline was tested. As shown in Table S1, the as-prepared Fe-Fe<sub>3</sub>C-LaOCl/CN-*hmta*-600 and Fe-Fe<sub>3</sub>C-LaOCl/CN-*hmta*-900 catalysts showed lower catalytic activity (21.8% and 24.7%, respectively) than that of developed Fe-Fe<sub>3</sub>C-LaOCl/CN-*hmta* (48.8%, pyrolyzed at 800 °C), suggesting that the different pyrolyzed temperatures have significant effect on the catalytic active sites (Fe-Fe<sub>3</sub>C) of prepared catalysts. Furthermore, crystalline structures of Fe-Fe<sub>3</sub>C species contained in Fe<sub>3</sub>C-LaOCl/CN-*hmta*-600 and Fe-Fe<sub>3</sub>C-LaOCl/CN-*hmta*-900 catalysts were analyzed by the XRD analysis (Fig. S2).

**Table S1** Comparison of the catalytic performance of different catalysts for the hydrogenation of nitrobenzene

| Entry | catalyst                                        | $T$<br>(°C) | (Eq.)/(P/bar) | $t$<br>(h) | Yield<br>(%) |
|-------|-------------------------------------------------|-------------|---------------|------------|--------------|
| 1     | LaOCl-800                                       | 85          | 4.0           | 3.0        | 0.91         |
| 2     | LaOCl/CN- <i>hmta</i> -800                      | 85          | 4.0           | 3.0        | 5.8          |
| 3     | Fe-Fe <sub>3</sub> C/CN- <i>hmta</i> -800       | 85          | 4.0           | 3.0        | 28.9         |
| 4     | Fe-Fe <sub>3</sub> C-LaOCl/CN- <i>hmta</i> -600 | 85          | 4.0           | 3.0        | 21.8         |
| 5     | Fe-Fe <sub>3</sub> C-LaOCl/CN- <i>hmta</i>      | 85          | 4.0           | 3.0        | 48.8         |
| 6     | Fe-Fe <sub>3</sub> C-LaOCl/CN- <i>hmta</i> -900 | 85          | 4.0           | 3.0        | 24.7         |

Reaction condition:  $n_{\text{nitrobenzene}} = 0.81$  mmol,  $n_{\text{hydrazine hydrate}} = 3.2$  mmol,  $m_{\text{catalyst}} = 20$  mg,  $V_{\text{ethanol}} = 10$  mL.

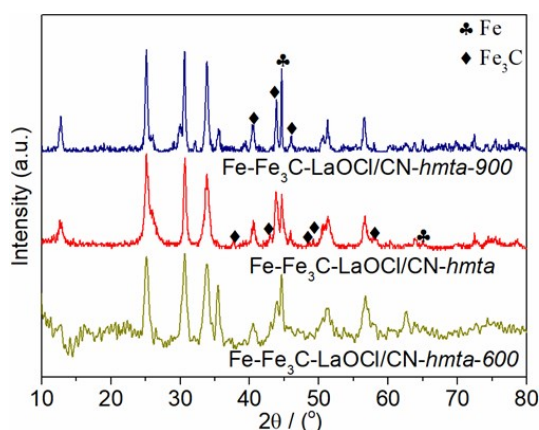

**Fig. S2** XRD patterns of Fe-Fe<sub>3</sub>C-LaOCl/CN-*hmta*- $T$  with different pyrolysis temperatures.

As shown in Fig. S2, it can be observed that the pyrolysis temperature has obvious effect on the phases and contents of Fe-Fe<sub>3</sub>C contained in the three catalysts. The metallic Fe is the dominant phase when pyrolysis temperature at 600 °C, whereas metallic Fe and Fe<sub>3</sub>C become the dominant phases when pyrolysis temperature at 800 °C (developed Fe-Fe<sub>3</sub>C-LaOCl/CN-*hmta* catalyst). When pyrolysis temperature increased to 900 °C, the metallic Fe became the dominant phase again contained in Fe-

Fe<sub>3</sub>C-LaOCl/CN-*hmta*-900. Correlated with above catalytic results, the change towards the contents of Fe-Fe<sub>3</sub>C suggested the synergy effect of Fe-Fe<sub>3</sub>C could effectively promote the catalytic performance of developed Fe-Fe<sub>3</sub>C-LaOCl/CN-*hmta* (pyrolyzed at 800 °C) for hydrogenation of nitrobenzene to aniline.

**Table S2** Comparison of the catalytic performance of different catalysts for the hydrogenation of nitrobenzene

| Entry | catalyst                                                    | Hydrogen source                                 | <i>T</i> (°C) | (Eq.)/(P/bar) | <i>t</i> (h) | Yield (%) |
|-------|-------------------------------------------------------------|-------------------------------------------------|---------------|---------------|--------------|-----------|
| 1     | Fe-Fe <sub>3</sub> C-LaOCl/CN- <i>hmta</i>                  | N <sub>2</sub> H <sub>4</sub> ·H <sub>2</sub> O | 85            | 4.0           | 6.5          | 98.7      |
| 2     | Fe <sub>2</sub> P@C <sup>S1</sup>                           | H <sub>2</sub>                                  | 120           | 50            | 12           | >99.0     |
| 3     | Fe-phenanthroline/C <sup>S2</sup>                           | N <sub>2</sub> H <sub>4</sub> ·H <sub>2</sub> O | 100           | 4.0           | 10           | 99.0      |
| 4     | FeO <sub>x</sub> @CN- <i>hpes</i> -400 <sup>S3</sup>        | N <sub>2</sub> H <sub>4</sub> ·H <sub>2</sub> O | 85            | 4.0           | 7.0          | 96.0      |
| 5     | Co-Co <sub>3</sub> O <sub>4</sub> @carbon-700 <sup>S4</sup> | H <sub>2</sub>                                  | 110           | 40            | 15           | 99.0      |
| 6     | Ni/C <sup>S5</sup>                                          | H <sub>2</sub>                                  | 25            | 5.0           | 7.0          | 100       |
| 7     | PdNPore-3 <sup>S6</sup>                                     | H <sub>2</sub>                                  | 25            | 2.0           | 7.0          | 99.0      |

On the basis of previous works and above characterization results, the plausible catalytic reaction process over Fe-Fe<sub>3</sub>C-LaOCl/CN-*hmta* for the hydrogenation of nitrobenzene to aniline was proposed.<sup>S7</sup> As illustrated in Fig. S3, the LaOCl-CN-*hmta* support with abundant structural defects serves as stronger Lewis basic sites for absorbing nitrobenzene molecule in comparison with Fe-Fe<sub>3</sub>C-LaOCl/CN-*urea* and Fe-Fe<sub>3</sub>C-LaOCl/CN (identified by UV analysis). Meanwhile, the synergy effect of Fe-Fe<sub>3</sub>C species confined in large specific area of Fe-Fe<sub>3</sub>C-LaOCl/CN-*hmta* could facilitate the absorption/dissociation of N<sub>2</sub>H<sub>4</sub>·H<sub>2</sub>O into the active H species. The enhanced ability of mass transfer facilitates the absorption of nitrobenzene reacting with the generated active H species to nitrosobenzene, with subsequent quickly the nitrosobenzene converted to intermediate hydroxylamine.

Finally, the hydroxylamine molecule is quickly hydrogenated to final product of aniline. Notably, the strong ability of dissociation  $\text{N}_2\text{H}_4\cdot\text{H}_2\text{O}$  molecules could also suppress the condensation reaction between nitrosobenzene and hydroxylamine to azobenzene.

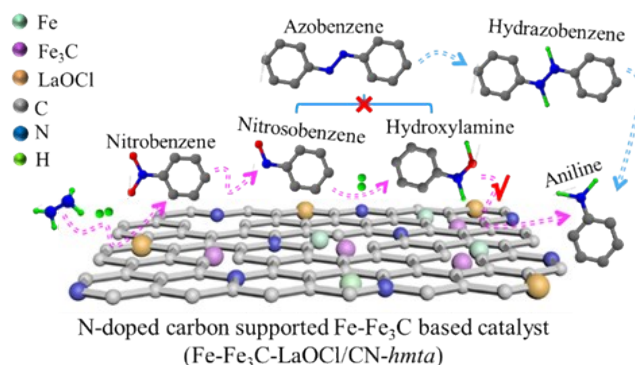

**Fig. S3** Plausible catalytic process over Fe-Fe<sub>3</sub>C-LaOCl/CN-hmta catalyst for hydrogenation of nitrobenzene to aniline.

## References

- S1 Y. Zhu, S. Yang, C. Cao, W. Song and L.-J. Wan, *Inorg. Chem. Front.*, 2018, **5**, 1094-1099.
- S2 R. V. Jagadeesh, G. Wienhofer, F. A. Westerhaus, A. E. Surkus, M. M. Pohl, H. Junge, K. Junge and M. Beller, *Chem. Commun.*, 2011, **47**, 10972-10974.
- S3 X. Li, T. Qi, J. Wang, W. She, G. Mao, P. Yan, W. Li and G. Li, *Mol. Catal.*, 2019, **477**, 110544.
- S4 B. Sahoo, D. Formenti, C. Topf, S. Bachmann, M. Scalone, K. Junge and M. Beller, *ChemSusChem*, 2017, **10**, 3035-3039.
- S5 Q. Tang, Z. Yuan, S. Jin, K. Yao, H. Yang, Q. Chi and B. Liu, *React. Chem. Eng.*, 2020, **5**, 58-65.
- S6 Y. Zhao, X. Feng, Y. Li, W. Zhang, Y. Yamamoto and M. Bao, *ChemistrySelect*, 2020, **5**, 7086-7092.
- S7 R. Yun, S. Zhang, W. Ma, X. Lv, S. Liu, T. Sheng and S. Wang, *Inorg. Chem.*, 2019, **58**, 9469-9475.
